# Supplementary material
Source: Springer Nature journal article supplement (https://www.springermedizin.de/resource/supplementary/12936_2007_422_MOESM4_ESM.pdf/9547418)

4 A.

Mboula (*An. gambiae* s.l.)

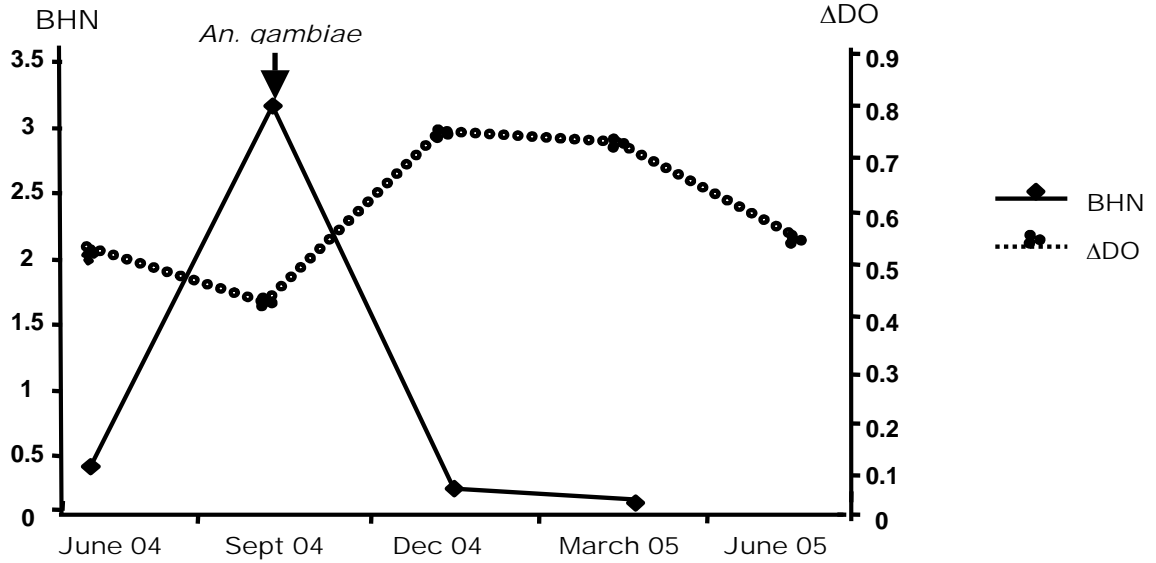

4 B

Gankette Balla (*An. funestus*)

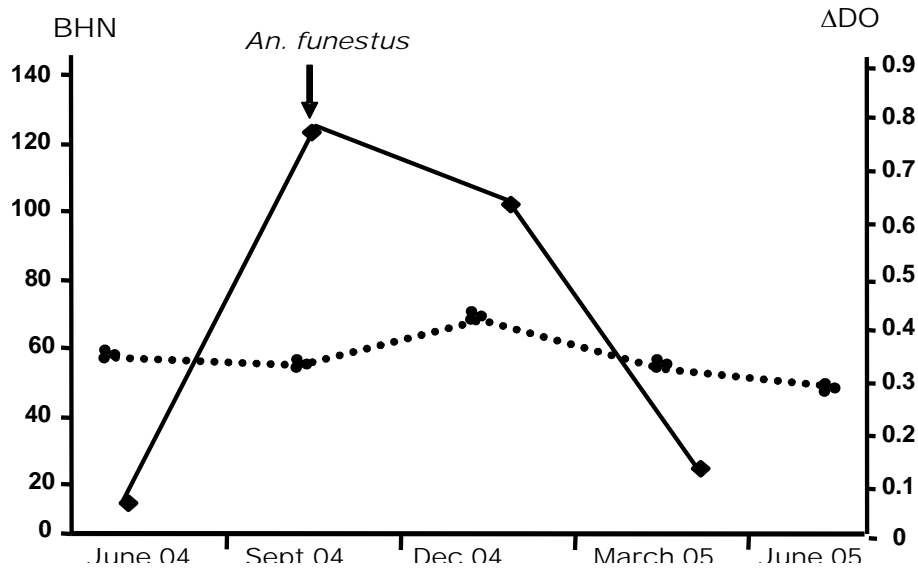

Supplement: MOESM4 [file 9547418]
